# Supplementary material for: Dengue genetic divergence generates within-serotype antigenic variation, but serotypes dominate evolutionary dynamics
Source: eLife. 2019 Aug 6;8:e42496. doi: 10.7554/eLife.42496 (PMC6731059; doi:10.7554/eLife.42496)
Supplement: Figure 2—source data 1. [file elife-42496-fig2-data1.csv]

	Mutation	$d_m$
58	I6V,S29G,F90Y,T176P,V197I,L475M	0.71
4	A19T	0.02
87	N83K	0.34
6	A88K	0.08
8	A88Q	1.39
140	Y90F	0.43
131	V91I	0.35
63	K93R	0.2
104	V114I	0.9
66	L122S	0.03
89	S122L	0.07
75	N124K	0.1
108	V129I	0.01
33	I129V	0.21
31	I129A	0.23
135	Y132I	0.12
137	Y132P,R233Q	0.34
36	I139V	0.05
10	D154E	0.03
61	K160V	0.03
18	E161T	0.22
0	A162I	0.19
39	I162A	0.29
41	I164V	0.01
93	T171S	0.23
111	V174E	0.46
20	E180T	0.43
77	N203E	0.04
80	N203K	0.08
14	D203N	0.14
24	E203N	1.09
22	E203D	1.34
45	I308V	0.18
28	G330D	0.22
48	I335V,N355T,P364V	0.18
69	L338E	0.43
97	T339I	0.65
113	V347A	0.28
52	I380V	0.45
114	V382A	0.04
118	V382I	0.37
82	N385K,V454I	0.12
16	D390S	0.12
84	N390S	0.18
122	V454T	0.25
124	V461F	0.01
26	F461I	0.03
57	I462V	0.1
71	L462I	0.16
127	V462L	2.11
100	T478S	0.1
91	S478M	0.43
129	V484I	0.39
