# Supplementary material for: Dengue genetic divergence generates within-serotype antigenic variation, but serotypes dominate evolutionary dynamics
Source: eLife. 2019 Aug 6;8:e42496. doi: 10.7554/eLife.42496 (PMC6731059; doi:10.7554/eLife.42496)
Supplement: Figure 4—source data 1. [file elife-42496-fig4-data1.csv]

	DENV4/CAMBODIA/NA/2010	DENV4/CAMBODIA/AC33/2011	DENV4/INDONESIA/AC36/1973	DENV4/DOMINICA/814669DELTA30/1981	DENV4/NICARAGUA/703/1999	DENV4/BRAZIL/NA/2012	DENV4/PUERTO_RICO/BIDV2446/1999	DENV2/SENEGAL/0674/1970	DENV2/MALAYSIA/DKD811/2008	DENV2/PERU/IQT2913/1996	DENV2/TONGA/DELTA30/1974	DENV2/VIETNAM/BIDV735/2006	DENV2/CAMBODIA/D2T0601085/2009	DENV2/VIETNAM/AC21/2003	DENV2/VIETNAM/AC20/2003	DENV2/NICARAGUA/BIDV533/2005	DENV2/NICARAGUA/BIDV571/2006	DENV3/CAMBODIA/AC23/2011	DENV3/NICARAGUA/BIDV4753/2009	DENV3/PUERTO_RICO/429965/2006	DENV3/FIJI/29472/1992	DENV3/INDONESIA/SLEMANDELTA30/1978	DENV3/MYANMAR/80931/2008	DENV3/VIETNAM/BIDV1329/2006	DENV3/VIETNAM/BIDV1817/2007	DENV1/VIETNAM/BIDV1937/2008	DENV1/MYANMAR/61117/2005	DENV1/CAMBODIA/BIDV1991/2003	DENV1/NAURU/WESTERNPACIFICDELTA30/1974	DENV1/PERU/IQT6152/2000	DENV1/BOLIVIA/FSB3363/2010	DENV1/PUERTO_RICO/BIDV852/2006
DENV4/MALAYSIA/P731120/1973	1.08746284125	0.447458976971		0.197939377612	0.584962500721						1.58072550783										2.29768054864	0.902024840437							0.447458976971			3.44745897697
DENV4/THAILAND/D85052/1985	0.280107919193	-0.341036917835	-0.241008099504	-1.670123152		-1.7589919005	-1.88752527074				1.04949499105	5.75731423956		4.7356768982	1.45943161864							0.24251538635		3.74250377771	3.32192809489			1.49476469175	-0.0473057147784			3.09953567355
DENV4/CAMBODIA/NA/2010	0.0	0.0995356735509		-0.464898013806	0.432959407276						2.08174919006			5.08360020162								0.554101537016							0.404390255079			3.58496250072
DENV4/CAMBODIA/AC33/2011	0.0	0.0		0.143222207903	0.847996906555						1.4194446008											0.902024840437								7.72996056102
DENV4/INDONESIA/S1228/1978			-0.184424571137				-1.80735492206					5.75731423956		4.63614122465	1.45943161864	0.13750352375					2.29768054864			3.74250377771	3.0							3.20645087747
DENV4/INDONESIA/AC36/1973	1.08746284125	-0.616671360448	0.0	-1.67410300291	-1.31120168829	0.241008099504	-1.26303440583				1.78598358239											0.493559995081							0.134301091712
DENV4/DOMINICA/814669DELTA30/1981		-0.793549122533	0.552541023029	0.0	-0.704544116474	-0.299560281859	-0.48542682717
DENV4/NICARAGUA/703/1999		0.321928094887	0.758991900496		0.0	-0.106915203917	-0.584962500721
DENV4/BRAZIL/NA/2012					-0.289506617195	0.0	-1.0			1.07038932789	2.79795622406	5.75731423956
DENV4/PUERTO_RICO/BIDV2446/1999				-2.17714874162		-0.106915203917	0.0				1.8719568055																		0.584962500721
DENV4/PUERTO_RICO/347751/1998		0.206450877467	0.0	-0.36994960975	-0.637429920615	-0.621488376746	-1.43295940728				2.79795622406																		0.447458976971			3.58496250072
DENV2/SENEGAL/0674/1970	1.62803122261	0.321928094887				0.241008099504		0.0	-0.331205908475	0.691877704638	1.47602812917	3.04682085675	0.896164189015	5.15071439748	-0.0848888975865	-0.628031222613	-0.071553261025	2.52925306813	0.807354922058	2.47643804394			0.552541023029		2.73696559417		3.64385618977	0.784271308945		4.39367717315	0.387023123109	3.58496250072
DENV2/MALAYSIA/DKD811/2008				1.01594154387					0.0	0.392317422779	0.622213896018	1.2167458582	2.60665757182		0.520832163301		0.673189683733					0.752647216398			3.44745897697				-0.20163386117
DENV2/PERU/IQT2913/1996	1.76553474636			0.807354922058					-0.0458036896131	0.0	0.613852287443	0.505939424496		3.84259210211	-0.599462070416	-1.0	-0.457206953523					0.0395283641866		4.12101540096	3.44745897697				-0.496831590442	5.96442581466		2.81942775436
DENV2/TONGA/DELTA30/1974	1.18057224564			0.497810551626					0.0962153152593	0.584962500721	0.0	1.34946711849	1.06608919046	4.7356768982	-0.909802191028	-0.34792330342	-0.161751069997	3.18132976471		3.54056838136		-0.0648082956281	0.552541023029	3.98351187721	3.58496250072	4.86624861111			-0.357812630586	6.46692615518
DENV2/VIETNAM/BIDV735/2006				0.835369298227					-0.175086706558	-0.131244533278	1.18442457114	0.0	1.81816167701		0.0901978089716														0.447458976971
DENV2/INDIA/742295/1974				1.01594154387						0.304854581528	1.24541520103	1.16962194608	1.74416109557	5.22110372537	0.874469117916	0.13750352375	-0.139724763667					0.850494539797						1.36923380967	0.0995356735509	7.35144893776
DENV2/PAPUANEWGUINEA/NEWGUINEAC/1944				1.18586654531						0.0703893278914	1.40439025508	5.2167458582	2.48112668974		-1.10535300015	-0.710493382805													0.447458976971	7.59245703727
DENV2/CAMBODIA/BIDV4265/2007											2.32980738832	0.983126181436			1.72246602447		1.29768054864
DENV2/CAMBODIA/BIDV3924/2008				0.984232684142							0.753562104697	1.53726575869			1.45943161864		1.97575245375					-0.0979751595633							-0.0473057147784
DENV2/CAMBODIA/D2T0601085/2009												1.59469403874			1.04439411936	0.0	0.928446738975													6.96442581466
DENV2/VIETNAM/AC21/2003	1.18057224564	0.0		0.863938450424	1.05444778402	0.241008099504	-0.378511623254	0.0931094043915	-2.02308361311	-0.855610090665	-2.44374531216	-3.14725196416	0.0	0.0	-2.1747744011	-2.49476469175	-2.83845613935	2.59636726399	0.48542682717	3.19264507794	2.0752881273	0.407260148687	0.758991900496	4.12101540096	2.81942775436	4.75077139369	4.74339186333	1.36923380967	-0.168397531696	4.80396114246	0.765534746363	0.678071905113
DENV2/VIETNAM/AC20/2003			1.13750352375	0.656938079505					-0.50523530825	0.392317422779	0.570887315509	-0.394278939112	2.36564947232	3.95806931953	0.0	-1.06413033742	-1.02424754625					0.42734439473		3.74250377771	3.44745897697	4.64385618977			0.0848888975865	7.05188865591		2.73696559417
DENV2/GUYANA/08221/2000	1.62803122261			0.656938079505		0.241008099504					1.27858206496	2.09262454637	1.2587342684		0.186413124231		-0.326810316267	3.28824496863				0.430719121511							-0.341036917835	7.72996056102
DENV2/BRAZIL/BR161/2004									0.6322682155	0.584962500721	2.4194446008	-0.0547171697091		5.08360020162	0.400537929584		0.154722594799
DENV2/NICARAGUA/BIDV533/2005				0.971741739958					0.49476469175	0.584962500721	0.936662494887	1.28896789611		4.37310681881	0.796466605915	0.0	-0.526747886776					0.776493958353		3.98351187721					0.537656785943	7.72996056102		3.0
DENV2/NICARAGUA/BIDV571/2006				0.829722735086					0.706268796943	0.304854581528	0.25198785495	1.41908433234		4.54303182026	0.13750352375	-0.34792330342	0.0					0.633536004511		3.98351187721					0.321928094887			3.44745897697
DENV3/PUERTO_RICO/S228762/1963				0.420331798948			-1.96347412397		0.561878887608	0.807354922058	1.38291872478	5.12928301694		5.22110372537		-0.540568381363					1.71271804792	-0.586910772511		1.23349013022	0.86249647625	5.12928301694			0.415037499279
DENV3/CAMBODIA/AC23/2011											2.11988431894							0.0	0.807354922058	1.75207248656	2.42321143072	-0.169058257625	0.65207669658	2.19501598241	3.0
DENV3/NICARAGUA/BIDV4753/2009				0.807354922058						1.07038932789	1.26190332382	5.89481776331						0.798860127892	0.0	0.272079545437	1.88264304936	-0.583401986734	0.371968777387	2.63558857379	2.20645087747				0.134301091712
DENV3/PUERTO_RICO/429965/2006				0.852442811586							1.31252939689	5.51630614005						0.465122730715	-0.192645077942	0.0	1.18220333122	-1.11427697189	-0.125530882084	1.29319637634					0.0	7.59245703727
DENV3/FIJI/29472/1992				1.11547721742							2.00440710152			5.22110372537				0.613645255425	0.392317422779	1.14201900487	0.0	-0.445898462984	-0.750021746992	1.3136604789	-0.0703893278914		5.2288186905		0.49185309633	7.35144893776		2.81942775436
DENV3/INDONESIA/SLEMANDELTA30/1978				0.922832139478							-0.621582667458	5.75731423956						1.18132976471		2.75207248656	1.79518020811	0.0	0.758991900496	2.08539149123	1.32192809489
DENV3/MYANMAR/80931/2008																		0.344828496997	0.691877704638	1.32757465803	1.0752881273		0.0	2.39854937649	1.69743722998
DENV3/VIETNAM/BIDV1329/2006				0.0703893278914				0.678071905113	1.25375659225		0.91433540777	5.30985526259	2.60665757182	4.0194698642	1.2370391973		2.0752881273	0.721898146077	0.48542682717	1.41503749928	0.5972408305	-1.18080159069	-0.898120385981	0.0	0.234465253637	5.12928301694	5.2288186905		-0.18903382439	7.46692615518		2.04890960048
DENV3/VIETNAM/BIDV1817/2007	1.50250034053			0.553598329812		0.241008099504	-0.13750352375		1.25375659225		1.27021859203	5.17235173884					2.0752881273	0.966316873744	-0.251538766996	-0.0223678130285	0.45637829466	-1.32504406811	-1.03242147769	0.903784684741	0.0		4.55074678538		-0.015941543869			2.81942775436
DENV1/VIETNAM/BIDV1937/2008				0.844829627476					1.6322682155	1.07038932789	1.62803122261	5.75731423956					2.42321143072				2.42321143072	0.902024840437			3.0	0.0	1.66810373602	0.0	-0.325770161182	2.62982388973	-0.234465253637	-0.772589503897
DENV1/MYANMAR/61117/2005															1.72246602447			3.66675659188							3.58496250072	-0.152415233154	0.0	-0.928446738975		0.830301534641	-1.91253715875	-1.22753572461
DENV1/CAMBODIA/BIDV1995/2003												5.75731423956		5.22110372537												1.07617168049			0.447458976971			-0.552541023029
DENV1/CAMBODIA/BIDV1991/2003				0.572334892393							0.970137199438											0.554101537016				1.72329065727	1.65592902208	0.0	-0.987927167699	2.20013961449	0.0	1.23446525364
DENV1/NAURU/WESTERNPACIFICDELTA30/1974											2.16568800856											0.606568956911				2.80735492206	2.90689059561	0.784271308945	0.0	3.93294758318	0.387023123109	1.54933859099
DENV1/THAILAND/16007/1964	1.76553474636			0.62243720614					1.49476469175	0.691877704638	-0.16551789992	4.46185835603		5.08360020162	0.956931278108	0.0	1.97575245375	3.18132976471	0.932885804141		1.42321143072	0.0216064561894		2.48874718546	1.54933859099	-0.242275845667	-0.0229004021101	-1.85315861167	-3.7889176738	0.0	-2.14135584925	-1.85466063684
DENV1/PERU/IQT6152/2000			0.65207669658			0.11547721742	-0.584962500721		0.706268796943	0.807354922058	1.03242147769	2.87689585531			-0.381870635344	-0.86249647625	0.753360032417				0.45637829466			3.3554806546	1.07400058144	-0.0204641025597			-0.678071905113			-1.7041342017
DENV1/VENEZUELA/OBT1298/2000				0.835369298227							1.04663533691											0.902024840437				2.16580889297	2.93603694127	1.36923380967	-0.6322682155	2.66818436343	0.0874628412503	1.44745897697
DENV1/BOLIVIA/FSB3363/2010											0.693619564241	5.40939093614												3.98351187721		1.97547768087	1.78256246061	1.49476469175	0.0588936890536	2.45943161864	0.0	1.35230174393
DENV1/PUERTO_RICO/BIDV852/2006				0.779874185635							1.15641019497							3.40372218605				0.577185150129				1.58084639225	1.93603694127		-0.688055993685			0.0
